# Supplementary material for: Occurrence, distribution, and risk assessment of the metals in sediments and fish from the largest reservoir in China
Source: Royal Society of Chemistry journal article supplement (doi:10.1039/c5ra09220e), 2015-01-01
Supplement: c5ra09220e1.pdf [file c5ra09220e1.pdf]

**Table 1S** The size, weight and habitat sites for different fishes samples

| Fish species                       | n  | Length mm    | Weight g        | Habitat      |
|------------------------------------|----|--------------|-----------------|--------------|
| <i>Cyprinus carpio</i>             | 10 | 375(252-502) | 586(146-1314)   | Bottom       |
| <i>Carassius auratus</i>           | 10 | 252(187-311) | 465(330-618)    | Bottom       |
| <i>Hypophthalmichthys molitrix</i> | 10 | 479(431-520) | 1355(1103-1564) | Middle-upper |
| <i>Aristichthys nobilis</i>        | 10 | 262(195-325) | 365(226-456)    | Middle-upper |
| <i>Siniperca chuatsi</i>           | 10 | 219(173-290) | 164(98-383)     | Middle-lower |
| <i>Silurus asotus</i>              | 10 | 493(215-749) | 1250(67-2406)   | Bottom       |
| <i>Culter dabryi</i>               | 10 | 535(410-671) | 588(436-892)    | Up           |
| <i>Megalobrama amblycephala</i>    | 10 | 301(244-362) | 465(251-706)    | Middle-lower |
